# Supplementary material for: Simplified Intestinal Microbiota to Study Microbe-Diet-Host Interactions in a Mouse Model
Source: PubMed Central journal article supplement (PMC6444000; doi:10.1016/j.celrep.2019.02.090), 2019-03-26
Supplement: mmc1.pdf [file mmc1.pdf]

**Cell Reports, Volume 26**

## **Supplemental Information**

### **Simplified Intestinal Microbiota to Study**

### **Microbe-Diet-Host Interactions in a Mouse Model**

**Petia Kovatcheva-Datchary, Saeed Shoaie, Sunjae Lee, Annika Wahlström, Intawat Nookaew, Anna Hallen, Rosie Perkins, Jens Nielsen, and Fredrik Bäckhed**

**Table S1. Nutritional information of the three mouse diets. Related to STAR methods.**

| <b>Ingredients (% by weight)</b> | <b>Chow*<br/>(Lab Diet 5021)</b> | <b>HF/HS**<br/>(Harlan TD.96132)</b> | <b>ZF/HS**<br/>(Harlan TD.03314)</b> |
|----------------------------------|----------------------------------|--------------------------------------|--------------------------------------|
| <b>Protein</b>                   | <b>21.0</b>                      | <b>20.9</b>                          | <b>20.0</b>                          |
| <b>Fat</b>                       | <b>9.4</b>                       | <b>20.2</b>                          | <b>0</b>                             |
| Saturated fatty acids            | 2.7                              | 8.3                                  | -                                    |
| Trans fatty acids                | -                                | 3.4                                  | -                                    |
| Monounsaturated fatty acids      | 2.6                              | 7.1                                  | -                                    |
| Polyunsaturated fatty acids      | 4.1                              | 1.4                                  | -                                    |
| <b>Carbohydrates***</b>          | <b>33.2</b>                      | <b>46.3</b>                          | <b>62.8</b>                          |
| Starch                           | 32.1                             | 16.0                                 | -                                    |
| Sucrose                          | 0.7                              | 18.3                                 | 62.8                                 |
| Maltodextrin                     | -                                | 12.0                                 | -                                    |
| Glucose                          | 0.2                              | -                                    | -                                    |
| Fructose                         | 0.2                              | -                                    | -                                    |
| <b>Neutral detergent fiber</b>   | <b>14.8</b>                      | <b>4.0</b>                           | <b>11.0</b>                          |
| Hemicellulose                    | 10.2                             | -                                    | -                                    |
| Cellulose                        | 4.6 ****                         | 4.0                                  | 11.0                                 |

\*Natural ingredient diet; \*\*Purified diet; \*\*\*Available carbohydrates; \*\*\*\*Cellulose and lignin.

**Table S5. Oligonucleotides, related to KEY RESOURCES TABLE**

| REAGENT or RESOURCE | SOURCE        | IDENTIFIER                |
|---------------------|---------------|---------------------------|
| Oligonucleotides    |               |                           |
| AM1                 | Sigma-Aldrich | CAGCACGTGAAGGTGGGGAC      |
| AM2                 | Sigma-Aldrich | CCTTGCGGTTGGCTTCAGAT      |
| Bt1F                | Sigma-Aldrich | ATAGCCTTTCGAAAGRAAGAT     |
| Bt1R                | Sigma-Aldrich | CCAGTATCAACTGCAATTTTA     |
| Bif164F             | Sigma-Aldrich | GGGTGGTAATGCCGGATG        |
| BiADO-2             | Sigma-Aldrich | CGAAGGGCTTGCTCCCAGT       |
| AERO-F              | Sigma-Aldrich | CTTTCAGCAGGGAAGAGTCAA     |
| AERO-R              | Sigma-Aldrich | AGCCATGCACCACCTGTATGG     |
| DSV691-F            | Sigma-Aldrich | CCGTAGATATCTGGAGGAACATCAG |
| DSV826-R            | Sigma-Aldrich | ACATCTAGCATCCATCGTTTACAGC |
| EhalF               | Sigma-Aldrich | GCGTAGGTGGCAGTGCAA        |
| EhalR               | Sigma-Aldrich | GCACCGRAGCCTATACGG        |
| RrecF               | Sigma-Aldrich | GCGGTRCGGCAAGTCTGA        |
| Rrec630mR           | Sigma-Aldrich | CCTCCGACACTCTAGTMCGAC     |
| g-Prevo-F           | Sigma-Aldrich | CACRGTAACGATGGATGCC       |
| g-Prevo-R           | Sigma-Aldrich | GGTCGGGTTGCAGACC          |
| RrecRi630F          | Sigma-Aldrich | GTCATCTAGAGTGTCCGGAGG     |
| Erec870R            | Sigma-Aldrich | AGTTTTYATTCTTGCGAACG      |
| Rflbr730F           | Sigma-Aldrich | GGCGGCYTRCTGGGCTTT        |
| Clep866mR           | Sigma-Aldrich | CCAGGTGGATWACTTATTGTGTTAA |
| UniF                | Sigma-Aldrich | GTGSTGCAYGGYYGTCGTCA      |
| UniR                | Sigma-Aldrich | ACGTCRTCCMCNCCTTCCTC      |
| 27F                 | Sigma-Aldrich | GTTTGATCCTGGCTCAG         |
| 1492 R              | Sigma-Aldrich | CGGCTACCTTGTTACGAC        |
